# Supplementary material
Source: PubMed Central journal article supplement (PMC2432089)
Supplement: NIHMS51235-supplement-appendix.pdf [file NIHMS51235-supplement-appendix.pdf]

## Appendix from P. A. Hohenlohe and S. J. Arnold, ‘MIPoD: A Hypothesis-Testing Framework for Microevolutionary Inference from Patterns of Divergence’

(Am. Nat., vol. 171, no. 3, p. 366)

### Construction of the Phylogenetic Divergence Matrix

To further illustrate the construction of the phylogenetic divergence matrix  $\mathbf{A}$ , we combine the  $\mathbf{G}$  matrix shown in figure 1A and the phylogeny shown in figure 2A. We thus have  $m = 2$  traits and  $n = 3$  taxa, so  $\mathbf{A}$  will be a 6-by-6 matrix. First, the  $\mathbf{G}$  matrix shown in figure 1A is parameterized by

$$\begin{pmatrix} \Sigma \\ \varepsilon \\ \varphi \end{pmatrix} = \begin{pmatrix} 5 \\ 0.6 \\ 0.8 \end{pmatrix}, \quad (\text{A1})$$

so the 2-by-2  $\mathbf{G}$  matrix is

$$\mathbf{G} = \begin{bmatrix} 2.49 & 0.50 \\ 0.50 & 2.51 \end{bmatrix}. \quad (\text{A2})$$

The matrix of shared ancestry  $\mathbf{T}$  for the taxa  $x$ ,  $y$ , and  $z$  is

$$\mathbf{T} = \begin{bmatrix} t_{xx} & t_{xy} & t_{xz} \\ t_{yx} & t_{yy} & t_{yz} \\ t_{zx} & t_{zy} & t_{zz} \end{bmatrix} = \begin{bmatrix} 1,000 & 200 & 200 \\ 200 & 1,000 & 800 \\ 200 & 800 & 1,000 \end{bmatrix}, \quad (\text{A3})$$

with time in generations. Each element in  $\mathbf{T}$  becomes a 2-by-2 block in  $\mathbf{A}$  by using equation (3), with  $N_e = 100$ , as follows:

$$\mathbf{A} = \begin{bmatrix} (1,000/100)\mathbf{G} & (200/100)\mathbf{G} & (200/100)\mathbf{G} \\ (200/100)\mathbf{G} & (1,000/100)\mathbf{G} & (800/100)\mathbf{G} \\ (200/100)\mathbf{G} & (800/100)\mathbf{G} & (1,000/100)\mathbf{G} \end{bmatrix}. \quad (\text{A4})$$

Thus, the final 6-by-6  $\mathbf{A}$  matrix is

$$\mathbf{A} = \begin{bmatrix} 24.85 & 5.00 & 4.97 & 1.00 & 4.97 & 1.00 \\ 5.00 & 25.15 & 1.00 & 5.03 & 1.00 & 5.03 \\ 4.97 & 1.00 & 24.85 & 5.00 & 19.88 & 4.00 \\ 1.00 & 5.03 & 5.00 & 25.15 & 4.00 & 20.12 \\ 4.97 & 1.00 & 19.88 & 4.00 & 24.85 & 5.00 \\ 1.00 & 5.03 & 4.00 & 20.12 & 5.00 & 25.15 \end{bmatrix}. \quad (\text{A5})$$

For example, the variance of the distribution of the expected mean of trait 1 in taxon  $x$  is 24.85, the covariance between trait 1 in taxon  $x$  and trait 1 in taxon  $y$  is 4.97, and the covariance between trait 1 in taxon  $x$  and trait 2 in taxon  $z$  is 1.00.

The vector of trait means at the root of the phylogeny in figure 2A is

$$\bar{\mathbf{z}}_0 = (0, 0). \quad (\text{A6})$$

Therefore, under a neutral model of evolution by drift, the vector of expected trait means across all taxa at the tips of the phylogeny is given by

$$\boldsymbol{\mu}' = (0, 0, 0, 0, 0, 0). \quad (\text{A7})$$

The population trait means at the tips of the phylogeny are thus a sample from the six-dimensional multivariate normal distribution with mean vector  $\boldsymbol{\mu}$  and variance/covariance matrix  $\mathbf{A}$  (eq. [10]).

**Table A1**

Estimates of species and regional population means for body and tail vertebral counts in *Thamnophis* and *Nerodia*

| Species                   | Subspecies or population | Body   | Tail   | <i>n</i>         | Reference                            |
|---------------------------|--------------------------|--------|--------|------------------|--------------------------------------|
| <i>T. melanogaster</i>    | <i>chihuahuensis</i>     | 145.20 | 72.50  | 10               | Tanner 1959                          |
| <i>T. melanogaster</i>    | <i>canescens</i>         | 143.70 | 60.50  | 37               | Conant 1963                          |
| <i>T. validus</i>         | <i>celaeno</i>           | 141.10 | 71.00  | 64               | Conant 1969                          |
| <i>T. validus</i>         | <i>thamnophisoides</i>   | 133.60 | 68.70  | 63               | Conant 1969                          |
| <i>T. errans</i>          | Chihuahua and Durango    | 158.73 | 73.30  | 11               | Smith 1942; Tanner 1959              |
| <i>T. exsul</i>           | Coahuila and Nuevo Leon  | 145.00 | 53.40  | 8                | Rossman et al. 1989                  |
| <i>T. godmani</i>         | Rangewide                | 141.75 | 65.56  | 12               | Smith 1942                           |
| <i>T. mendax</i>          | Rangewide                | 141.50 | 58.00  | 7 <sup>a</sup>   | Rossman et al. 1996                  |
| <i>T. sumichrasti</i>     | Rangewide                | 152.50 | 62.50  | ...              | Rossman et al. 1996                  |
| <i>T. scalaris</i>        | Rangewide                | 140.00 | 59.79  | 15               | Smith 1942                           |
| <i>T. nigronuchalis</i>   | Rangewide                | 156.53 | 66.57  | 15               | Tanner 1985                          |
| <i>T. rufipunctatus</i>   | Rangewide                | 164.68 | 70.21  | 25               | Tanner 1985                          |
| <i>T. atratus</i>         | San Francisco Peninsula  | 147.00 | 71.00  | 57 <sup>a</sup>  | Fox 1951                             |
| <i>T. elegans</i>         | Lassen Co., CA           | 167.52 | 80.59  | 708              | Arnold and Phillips 1999             |
| <i>T. elegans</i>         | Humboldt Co., CA         | 151.73 | 71.25  | 481              | Arnold and Phillips 1999             |
| <i>T. couchii</i>         | Feather River, CA        | 174.00 | 82.00  | 16               | Fitch 1940                           |
| <i>T. gigas</i>           | San Joaquin Valley, CA   | 161.00 | 73.00  | 13               | Fitch 1940                           |
| <i>T. ordinoides</i>      | Del Norte Co., CA        | 144.93 | 63.63  | 128              | Fox 1948                             |
| <i>T. hammondii</i>       | San Diego Co., CA        | 162.60 | 73.00  | 62 <sup>a</sup>  | Fitch 1940; McGuire and Grismer 1993 |
| <i>T. brachystoma</i>     | Pennsylvania             | 136.60 | 59.30  | 34               | Barton 1956                          |
| <i>T. butleri</i>         | Ohio                     | 137.50 | 56.60  | 19 <sup>a</sup>  | Conant 1938                          |
| <i>T. radix</i>           | <i>Radix</i>             | 151.00 | 65.00  | 400              | Smith 1949                           |
| <i>T. radix</i>           | <i>haydeni</i>           | 157.20 | 67.00  | 233              | Smith 1949                           |
| <i>T. eques</i>           | <i>virgatenuis</i>       | 157.26 | 71.97  | 57               | Conant 1963                          |
| <i>T. eques</i>           | <i>megalops</i>          | 157.50 | 71.13  | 48               | Conant 1963                          |
| <i>T. marcianus</i>       | <i>nigrolateris</i>      | 156.80 | 68.20  | 60               | Mittelman 1949                       |
| <i>T. marcianus</i>       | <i>marcianus</i>         | 149.10 | 68.60  | 79               | Mittelman 1949                       |
| <i>T. cyrtopsis</i>       | <i>collaris</i>          | 153.40 | 88.70  | 61 <sup>a</sup>  | Webb 1966                            |
| <i>T. pulchrilatus</i>    | Rangewide                | 162.70 | 76.10  | 15 <sup>a</sup>  | Webb 1966                            |
| <i>T. cyrtopsis</i>       | <i>cyrtopsis</i>         | 167.90 | 78.30  | 196 <sup>a</sup> | Milstead 1953                        |
| <i>T. chryseocephalus</i> | Rangewide                | 145.00 | 73.00  | ...              | Rossman et al. 1996                  |
| <i>T. fulvus</i>          | Rangewide                | 140.69 | 62.73  | 40               | UMMZ, UTA                            |
| <i>T. proximus</i>        | Rangewide                | 163.89 | 100.86 | 782              | Rossman 1963                         |
| <i>T. sauritus</i>        | Rangewide                | 156.75 | 112.08 | 549              | Rossman 1963                         |
| <i>T. sirtalis</i>        | Lassen Co., CA           | 160.12 | 78.73  | 199              | OSCMNH                               |
| <i>T. sirtalis</i>        | Humboldt Co., CA         | 151.70 | 79.95  | 268              | OSCMNH                               |
| <i>N. erythrogaster</i>   | <i>neglecta</i>          | 152.60 | 65.00  | 7                | Conant 1949                          |

**Table A1 (Continued)**

| Species                 | Subspecies or population    | Body   | Tail  | <i>n</i> | Reference   |
|-------------------------|-----------------------------|--------|-------|----------|-------------|
| <i>N. erythrogaster</i> | <i>flavigaster</i>          | 150.00 | 66.60 | 8        | Conant 1949 |
| <i>N. fasciata</i>      | North Carolina and Virginia | 129.57 | 69.50 | 213      | Osgood 1978 |

**Note:** Sample sizes (*n*) are numbers of female specimens. Midpoints of ranges, rather than means, are reported for *T. chrysocephalus*, *T. mendax*, and *T. sumichrasti*. Data for *T. fulvus* and *T. sirtalis* were taken from museum specimens (UMMZ, University of Michigan; UTA, University of Texas, Arlington; OSCMNH, Oregon State University).

<sup>a</sup> Cases in which only the total number of both sexes was reported, so the number of female specimens was estimated by dividing the total sample size in half.

**Table A2**

Results of hypothesis testing with the garter snake test case, starting from four different direct estimates of **G** and a single estimate of **P**

| Additional ML parameter estimate                | G matrix parameters     |                         |             | lnL( $\theta$ ) | LR     | df  | P value |
|-------------------------------------------------|-------------------------|-------------------------|-------------|-----------------|--------|-----|---------|
|                                                 | $\Sigma$                | $\epsilon$              | $\varphi$   |                 |        |     |         |
| <i>Thamnophis elegans</i> mean <b>G</b> matrix: |                         |                         |             |                 |        |     |         |
| None                                            | 15.51                   | .629                    | .843        | -408.37         | ...    | ... | ...     |
| Size ( $\Sigma$ )                               | <b>.308 (.228-.428)</b> | .629                    | .843        | -293.71         | 229.33 | 1   | <.0001  |
| Shape ( $\epsilon$ )                            | <b>.338 (.251-.471)</b> | <b>.793 (.677-.862)</b> | .843        | -290.57         | 6.28   | 1   | .0122   |
| Orientation ( $\varphi$ )                       | <b>.338 (.251-.471)</b> | <b>.871 (.793-.914)</b> | <b>.513</b> | -283.20         | 14.74  | 1   | .0001   |
| <i>T. elegans</i> coastal <b>G</b> matrix:      |                         |                         |             |                 |        |     |         |
| None                                            | 14.68                   | .534                    | 1.376       | -407.62         | ...    | ... | ...     |
| Size ( $\Sigma$ )                               | <b>.342 (.254-.477)</b> | .534                    | 1.376       | -299.14         | 216.96 | 1   | <.0001  |
| Shape ( $\epsilon$ )                            | <b>.338 (.251-.471)</b> | <b>.442 (.306-.595)</b> | 1.376       | -298.47         | 1.33   | 1   | .248    |
| Orientation ( $\varphi$ )                       | <b>.338 (.251-.471)</b> | <b>.871 (.793-.914)</b> | <b>.513</b> | -283.20         | 30.55  | 1   | <.0001  |
| <i>T. elegans</i> inland <b>G</b> matrix:       |                         |                         |             |                 |        |     |         |
| None                                            | 16.33                   | .731                    | .785        | -406.99         | ...    | ... | ...     |
| Size ( $\Sigma$ )                               | <b>.304 (.226-.423)</b> | .731                    | .785        | -289.90         | 234.17 | 1   | <.0001  |
| Shape ( $\epsilon$ )                            | <b>.338 (.251-.471)</b> | <b>.817 (.712-.878)</b> | .785        | -288.73         | 2.35   | 1   | .125    |
| Orientation ( $\varphi$ )                       | <b>.338 (.251-.471)</b> | <b>.871 (.793-.914)</b> | <b>.513</b> | -283.20         | 11.06  | 1   | .0009   |
| <i>Thamnophis sirtalis</i> <b>G</b> matrix:     |                         |                         |             |                 |        |     |         |
| None                                            | 7.44                    | .851                    | .993        | -369.53         | ...    | ... | ...     |
| Size ( $\Sigma$ )                               | <b>.468 (.347-.652)</b> | .851                    | .993        | -298.19         | 142.67 | 1   | <.0001  |
| Shape ( $\epsilon$ )                            | <b>.338 (.251-.471)</b> | <b>.712 (.569-.807)</b> | .993        | -294.87         | 6.64   | 1   | .0100   |
| Orientation ( $\varphi$ )                       | <b>.338 (.251-.471)</b> | <b>.871 (.793-.914)</b> | <b>.513</b> | -283.20         | 23.35  | 1   | <.0001  |
| <i>T. elegans</i> mean <b>P</b> matrix:         |                         |                         |             |                 |        |     |         |
| None                                            | 30.59                   | .636                    | .770        | -434.33         | ...    | ... | ...     |
| Size ( $\Sigma$ )                               | <b>.301 (.224-.419)</b> | .636                    | .770        | -292.73         | 283.19 | 1   | <.0001  |
| Shape ( $\epsilon$ )                            | <b>.338 (.251-.471)</b> | <b>.822 (.720-.882)</b> | .770        | -288.26         | 8.95   | 1   | .0028   |
| Orientation ( $\varphi$ )                       | <b>.338 (.251-.471)</b> | <b>.871 (.793-.914)</b> | <b>.513</b> | -283.20         | 10.12  | 1   | .0015   |

**Note:** Direct estimates of the parameters of the **G** matrix or **P** matrix are shown in the first row of each analysis (all estimates for *T. elegans* from Arnold and Phillips 1999; estimate for *T. sirtalis* from Dohm and Garland 1993). In each subsequent row, parameter values in bold were estimated by maximum likelihood (ML) from divergence data. The remaining parameters were fixed at the direct estimates. Marginal 95% confidence intervals around ML estimates for  $\Sigma$  and  $\epsilon$  are given in parentheses. Estimates of  $\Sigma$  are scaled to  $\bar{N}_e = 500$ ; lnL( $\theta$ ) gives the log<sub>e</sub> likelihood of the parameter values in each row of the table. LR gives the likelihood ratio test statistic (LR = 2 × [lnL( $\theta_i$ ) - lnL( $\theta_o$ )]), where subscripts denote rows in the table. The statistical significance of LR (P value) was evaluated with a  $\chi^2$  distribution with the indicated degrees of freedom (df).

**Table A3**

Results of hypothesis testing of the effect of two taxa and the alignment of  $\mathbf{d}_{\max}^*$  with estimates of  $\omega_{\max}$  from two different selection surfaces

| Alternative hypothesis                    | G matrix parameters     |                         |             | $\ln L(\theta)$ | LR    | df  | P value |
|-------------------------------------------|-------------------------|-------------------------|-------------|-----------------|-------|-----|---------|
|                                           | $\Sigma$                | $\varepsilon$           | $\varphi$   |                 |       |     |         |
| ML best fit                               | <b>.338</b> (.251–.471) | <b>.871</b> (.793–.914) | <b>.513</b> | –283.20         | ...   | ... | ...     |
| Reduced data set best fit                 | <b>.331</b> (.244–.465) | <b>.910</b> (.854–.941) | <b>.473</b> | –285.11         | 3.83  | 3   | .2804   |
| <i>Thamnophis elegans</i> $\omega_{\max}$ | <b>.338</b> (.251–.471) | <b>.866</b> (.786–.911) | .430        | –283.82         | 1.25  | 1   | .2638   |
| <i>Thamnophis radix</i> $\omega_{\max}$   | <b>.338</b> (.251–.471) | <b>.804</b> (.693–.869) | .817        | –289.76         | 13.12 | 1   | .0003   |

**Note:** The ML best fit represents the maximum likelihood estimate of all three parameters (with marginal 95% confidence limits for  $\Sigma$  and  $\varepsilon$ ) using the full garter snake data set. The remaining rows of the table each represent a likelihood ratio test against the parameter values in the first row. The reduced data set best fit represents the ML estimate of all three parameters to the data set with *Thamnophis proximus* and *Thamnophis sauritus* removed. In the last two rows,  $\varphi$  was held constant at the direct estimate from  $\omega_{\max}$  estimated from growth rate in *T. elegans* and crawling speed in *T. radix*. All parameter values in bold were estimated by maximum likelihood, while others were held constant. Statistics as in table A2.

## Literature Cited in Appendix

- Barton, A. J. 1956. A statistical study of *Thamnophis brachystoma* (Cope) with comments on the kinship of *T. butleri* (Cope). Proceedings of the Biological Society of Washington 69:71–82.
- Conant, R. 1938. The reptiles of Ohio. American Midland Naturalist 20:1–200.
- . 1949. Two new races of *Natrix erythrogaster*. Copeia 1949:1–15.
- . 1963. Semiaquatic snakes of the genus *Thamnophis* from the isolated drainage system of the Rio Nazas and adjacent areas in Mexico. Copeia 1963:473–499.
- . 1969. A review of the water snakes of the genus *Natrix* in Mexico. Bulletin of the American Museum of Natural History 142:1–140.
- Fitch, H. S. 1940. A biogeographical study of the *ordinoides* Artenkreis of garter snakes (genus *Thamnophis*). University of California Publications in Zoology 44:1–150.
- Fox, W. 1948. The relationships of the garter snake *Thamnophis ordinoides*. Copeia 1948:113–120.
- . 1951. Relationships among the garter snakes of the *Thamnophis elegans* Rassenkreis. University of California Publications in Zoology 50:485–530.
- McGuire, J. A., and L. A. Grismer. 1993. The taxonomy and biogeography of *Thamnophis hammondi* and *T. digueti* (Reptilia: Squamata: Colubridae) in Baja California, Mexico. Herpetologica 49:354–365.
- Milstead, W. W. 1953. Geographic variation in the garter snake, *Thamnophis cyrtopsis*. Texas Journal of Science 5:348–379.
- Mittelman, M. B. 1949. Geographic variation in Marcy's garter snake, *Thamnophis marcianus* (Baird and Girard). Bulletin of the Chicago Academy of Sciences 8:235–249.
- Osgood, D. W. 1978. Effects of temperature on the development of meristic characters in *Natrix fasciata*. Copeia 1978:33–37.
- Rossman, D. A. 1963. The colubrid snake genus *Thamnophis*: a revision of the *sauritus* group. Bulletin of the Florida State Museum 7:99–178.
- Rossman, D. A., E. A. Liner, C. H. Treviño, and A. H. Chaney. 1989. Redescription of the garter snake *Thamnophis exsul* Rossman, 1969 (Serpentes: Colubridae). Proceedings of the Biological Society of Washington 102:507–514.
- Smith, A. G. 1949. The subspecies of the Plains garter snake, *Thamnophis radix*. Bulletin of the Chicago Academy of Sciences 8:285–300.
- Smith, H. M. 1942. The synonymy of the garter snakes (*Thamnophis*), with notes on Mexican and Central American species. Zoologica 27:97–123.
- Tanner, W. W. 1959. A new *Thamnophis* from western Chihuahua with notes on four other species. Herpetologica 15:165–172.
- . 1986. Snake of western Chihuahua. Great Basin Naturalist 48:499–507.
- Webb, R. G. 1966. Resurrected names for Mexican populations of black-necked garter snakes, *Thamnophis cyrtopsis* (Kennicott). Tulane Studies in Zoology and Botany 13:55–70.
